# Supplementary material
Source: MDPI journal article supplement (https://www.mdpi.com/2073-4441/14/16/2461)
Supplement: s1 [file s1]

*Supplementary material*

# Water, Water Everywhere, nor Any Drop to Drink? Options for Improving the Resilience of a Subtropical Island to Drought and the Sensitivity of Their Yield under a Projected Drier Future Climate

**Table S1.** Capital costs for a skid-mounted 2.3 m<sup>3</sup>/hour fastRO plant (A50). All costs in 2019 AUD.

| ITEM                                                         | QUAN-<br>TITY | UNIT<br>RATE<br>(\$) | COST<br>(\$) | COMMENT                                                                                       |
|--------------------------------------------------------------|---------------|----------------------|--------------|-----------------------------------------------------------------------------------------------|
| Containerised desalinisation plant                           | -             | -                    | -            |                                                                                               |
| Preparation of site for desalinisa-<br>tion plant            | -             | LS†                  | 12,500       |                                                                                               |
| Supply containerised desalinisa-<br>tion plant               | 1             | 80,000               | 80,000       | Delivery to mainland Australia. Does not<br>include delivery to Norfolk Island.               |
| Transport desalinisation plant to<br>Norfolk Island and site |               | LS                   | 13,000       | Shipping and transport to site.                                                               |
| Corrosion-resistant and tamper-<br>proof housing             | 1             | 10,000               | 10,000       |                                                                                               |
| Electrical connection to plant                               | -             | LS                   | 12,500       | Includes cabling and switchboards.                                                            |
| Monitoring equipment                                         | -             | LS                   | 17,500       | Pressure transmitters, flow meters, and<br>water quality monitoring devices, data<br>loggers. |
| Commission desalinisation plant                              | -             | LS                   | 40,000       |                                                                                               |
| Seawater intake system                                       | -             | -                    | -            |                                                                                               |
| Supply seawater pump                                         | 2             | 4000                 | 8,000        | Quote from AC Hargreaves Brisbane<br>agents.                                                  |
| Supply and install inlet cage                                | -             | LS                   | 10,000       |                                                                                               |
| Electrical connection                                        | -             | LS                   | 5,000        |                                                                                               |
| Install seawater pump                                        | -             | LS                   | 15,000       | Installation of seawater pump on jetty.                                                       |
| Seawater delivery pipeline                                   | -             | -                    | -            |                                                                                               |
| Supply seawater delivery pipeline                            | 160           | 12                   | 1,920        | 90-mm diameter HDPE Class 4.                                                                  |
| Install seawater delivery pipeline                           | 160           | 35                   | 5,600        |                                                                                               |
| Brine outlet system                                          | -             | -                    | -            |                                                                                               |
| Supply brine discharge pipeline                              | 150           | 12                   | 1,800        | 90 mm diameter HDPE Class 4.                                                                  |
| Supply brine discharge pipeline<br>weights                   | -             | LS                   | 3,000        |                                                                                               |
| Install brine discharge pipeline                             | 150           | 35                   | 5,250        |                                                                                               |
| Freshwater delivery system                                   | -             | -                    | -            |                                                                                               |

| ITEM                                                          | QUAN-<br>TITY | UNIT<br>RATE<br>(\$) | COST<br>(\$)                      | COMMENT                                                                                                                         |
|---------------------------------------------------------------|---------------|----------------------|-----------------------------------|---------------------------------------------------------------------------------------------------------------------------------|
| Balancing storage supplied to site and connection into system | 1             | 12,500               | 12,500                            | Nominally a 20,000-L tank.                                                                                                      |
| Supply freshwater pump to site                                | 2             | 3,200                | 6,400                             | Vertical multi-stage centrifugal pump and backup pump. 110 m head requirement.                                                  |
| Install freshwater pumps                                      | -             | LS                   | 5,000                             |                                                                                                                                 |
| Electrical connection                                         | -             | LS                   | 5,000                             |                                                                                                                                 |
| Supply freshwater delivery pipe-line to storage tanks         | 280           | 12                   | 3,360                             | 50-mm HDPE pipe.                                                                                                                |
| Install freshwater delivery pipe-line to storage tanks        | 280           | 35                   | 9800                              |                                                                                                                                 |
| Freshwater storage system                                     | -             | -                    | -                                 |                                                                                                                                 |
| Prepare site for freshwater storage tanks                     | -             | LS                   | 12,500                            |                                                                                                                                 |
| Supply to two 92,500-L tanks                                  | 2             | 13,000               | 26,000                            | Pioneer GT90 water tank.                                                                                                        |
| Construct concrete slabs                                      | 2             | 8,000                | 16,000                            | Assumes continuous slab for easy identification of leaks and a concrete cost of \$700/m <sup>3</sup> (not including placement). |
| Erect tanks on-site                                           | 2             | 3,250                | 6,500                             |                                                                                                                                 |
| Direct costs                                                  | -             | -                    | <b>344,130</b>                    |                                                                                                                                 |
| Overheads                                                     | -             | 15%                  | 51,620                            |                                                                                                                                 |
| Total                                                         | -             | -                    | <b>395,750</b>                    |                                                                                                                                 |
| Contingency                                                   | -             | 30%                  | 118,725                           |                                                                                                                                 |
| Total project cost                                            | -             | -                    | <b>514,474</b>                    | <b>Say \$515,000</b>                                                                                                            |
| Expected range of total project costs                         | -             | <b>±30%</b>          | <b>Say \$360,000 to \$670,000</b> |                                                                                                                                 |

**Table S2.** Cost of potential Cockpit Falls dam at FSL of 36 mASL.

| ITEM                     | UNIT<br>COST<br>(\$) | UNITS | COST<br>(\$) | COMMENT |
|--------------------------|----------------------|-------|--------------|---------|
| Diversion costs          | -                    | -     | -            |         |
| Excavation for diversion | 15                   | 52    | 790          |         |
| Diversion pipeline       | 500                  | 8.72  | 4,360        |         |
| Outlet valve             | -                    | LS†   | 2,000        |         |
| Upstream coffer dams     | 5,000                | 1     | 5,000        |         |
| Remove coffer dam        | 3,000                | 1     | 3,000        |         |
| Dewatering               | 5,000                | 1     | 5,000        |         |
| Dam construction costs   | -                    | -     | -            |         |

| ITEM                                                  | UNIT<br>COST<br>(\$) | UNITS  | COST<br>(\$)     | COMMENT |
|-------------------------------------------------------|----------------------|--------|------------------|---------|
| Access road to dam site                               | 10,000               | LS     | 10,000           |         |
| Reservoir area clearing and root excavation           | 10,000               | 0.66   | 6,630            |         |
| Foundation excavation                                 | 30                   | 529.00 | 15,870           |         |
| Treatment of seams                                    | LS                   | -      | 15,000           |         |
| Excavation across streambed                           | 20                   | 3      | 60               |         |
| Excavation of abutments                               | 5                    | 808    | 4,040            |         |
| Key trench excavation                                 | 10                   | 80     | 800              |         |
| Key trench backfill                                   | 20                   | 50     | 1,000            |         |
| Embankment fill (supply and placement and compaction) | 10                   | 6,624  | 66,240           |         |
| Downstream topsoil and grassing                       | 10                   | 614    | 6,140            |         |
| Excavate trench for liner                             | 9                    | 50     | 450              |         |
| Backfill anchor trench for liner                      | 9                    | 100    | 900              |         |
| Reservoir lining, transport and installation          | 35                   | 16,114 | 563,990          |         |
| Fencing                                               | 20                   | 1,623  | 32,450           |         |
| Spillway #                                            | 84,000               | 1      | 84,000           |         |
| Relocate existing infrastructure and maintain access  | 10,000               | 1      | 10,000           |         |
| Water treatment and storage                           | -                    | -      | -                |         |
| Pre-filter, UV unit and protective housing            | -                    | -      | 20,000           |         |
| Electrical connection                                 | -                    | -      | 20,000           |         |
| Treated water storage tank (50 kL)                    | -                    | -      | 17,000           |         |
| Total direct costs (TDC)                              | -                    | -      | <b>894,720</b>   |         |
| Contractor overheads                                  | -                    | -      | -                |         |
| Mobilisation/demobilisation                           | 5% TDC               | -      | 44,740           |         |
| Site overheads (accommodation)                        | 10% TDC              | -      | 89,470           |         |
| Contingencies                                         | 30% TDC              | -      | 268,420          |         |
| Total contractor overheads (TCO)                      | -                    | -      | 402,630          |         |
| Total construction cost (TCC)                         | -                    | -      | <b>1,297,350</b> |         |
| Design costs, approvals and acquisition               | -                    | -      | -                |         |
| Design costs and approvals                            | 10% TDC              | -      | 89,470           |         |
| Land acquisition (ha)                                 | -                    | -      | -                |         |
| Total design costs (TDC)                              | -                    | -      | <b>89,470</b>    |         |
| Total cost (TC)                                       | -                    | -      | <b>1,386,820</b> |         |

| ITEM                        | UNIT<br>COST<br>(\$) | UNITS | COST<br>(\$) | COMMENT |
|-----------------------------|----------------------|-------|--------------|---------|
| Upper estimate (+50%)       | -                    | -     | 2,080,230    |         |
| Lower estimate (−30%)       | -                    | -     | 970,770      |         |
| Total cost (without lining) | -                    | -     | 457,390      |         |
| Upper estimate (+50%)       | -                    | -     | 686,090      |         |
| Upper estimate (−30%)       | -                    | -     | 320,170      |         |

Table S3. indicative capital costs of cluster-scale RHRWS of Option 1.

| ITEM                                                               | QUAN-<br>TITY | UNIT<br>RATE (\$) | COST<br>(\$) | COMMENT                                                                                           |
|--------------------------------------------------------------------|---------------|-------------------|--------------|---------------------------------------------------------------------------------------------------|
| Total direct costs                                                 | -             | -                 | -            |                                                                                                   |
| Roofing and piping to site                                         | -             | -                 | -            |                                                                                                   |
| Piping to connect building #1                                      | -             | -                 | 3,000        |                                                                                                   |
| Piping to connect building #2                                      | -             | -                 | 3,000        |                                                                                                   |
| Piping to connect building #3                                      | -             | -                 | 3,000        |                                                                                                   |
| Trunk pipe to storage area                                         | -             | -                 | 32,500       | 300-mm PVC pipe (including \$10,000 for fittings and installation).                               |
| Overflow piping to Broken Bridge Creek                             | -             | -                 | 22,500       | Including trenching and outlet works at creek.                                                    |
| Total                                                              | -             | -                 | 64,000       |                                                                                                   |
| Site preparation and tank construction                             | -             | -                 | -            |                                                                                                   |
| Water carter access road and turning circle to water delivery area | -             | LS†               | 5,000        |                                                                                                   |
| Earthworks excavation and leveling                                 | 6,750         | 15                | 101,250      | Higher unit cost due to confined working space. Assumes 1.5 m depth of excavation.                |
| Supply and construction of 0.5-ML tanks                            | 15            | 65,000            | 975,000      | No including plumbing.                                                                            |
| Security fencing                                                   | 400           | 110               | 44,000       | Unit cost per metre.                                                                              |
| Total                                                              | -             | -                 | 1,125,250    |                                                                                                   |
| Inter-tank connection and pumps                                    | LS            | -                 | -            |                                                                                                   |
| Electrical connection to site                                      | 50            | 20,000            | 20,000       |                                                                                                   |
| Piping and plumbing to water treatment                             | 3             | 70                | 7,900        | 50-mm pressure pipe to enable pumping from any tank, including labour for trenching and plumbing. |
| Pumps and installation and electrical connection                   | -             | 5,000             | 15,000       | Redistributing water between tanks.                                                               |

| ITEM                                                                    | QUAN-<br>TITY | UNIT<br>RATE (\$) | COST<br>(\$)     | COMMENT                                                                                                                                |
|-------------------------------------------------------------------------|---------------|-------------------|------------------|----------------------------------------------------------------------------------------------------------------------------------------|
| Piping interconnecting tanks and overflow interconnections and plumbing | -             | -                 | 20,000           |                                                                                                                                        |
| Electronic monitoring of water levels                                   | -             | LS                | 10,000           |                                                                                                                                        |
| Total                                                                   | -             | -                 | <b>72,900</b>    |                                                                                                                                        |
| Water treatment                                                         | -             | -                 | -                |                                                                                                                                        |
| 50,000-L tank                                                           | 1             | 14000             | 14,000           | Minus plumbing and electrical connection.                                                                                              |
| Standpipes and piping to trucks                                         | 2             | 2500              | 5,000            |                                                                                                                                        |
| Housing                                                                 | -             | LS                | 5,000            |                                                                                                                                        |
| In-line filter                                                          | 1             | 1400              | 1,400            | Scheme design and treatment would need a targeted water quality study to evaluate risks and ensure the treatment train is appropriate. |
| Commercial grade UV treatment (50,000 L/day capacity) and housing       | 1             | 7000              | 7,000            | 50,000 L/day capacity.                                                                                                                 |
| Electrical connection to site                                           | LS            | 5000              | 5,000            |                                                                                                                                        |
| Total                                                                   | -             | -                 | <b>37,400</b>    |                                                                                                                                        |
| Total direct cost (TDC)                                                 | -             | -                 | <b>1,299,550</b> |                                                                                                                                        |
| Contractor overheads                                                    | -             | -                 | -                |                                                                                                                                        |
| Mobilisation/demobilisation                                             | 5%            | -                 | 64,978           |                                                                                                                                        |
| Site overheads                                                          | 5%            | -                 | 64,978           | On basis that main unit is modular.                                                                                                    |
| Contingencies                                                           | 30%           | -                 | 389,865          |                                                                                                                                        |
| Total                                                                   | -             | -                 | <b>519,820</b>   |                                                                                                                                        |
| Design costs, approvals and acquisition                                 | 10%           | -                 | -                |                                                                                                                                        |
| Design costs, approvals and project management                          | -             | -                 | 129,955          | Includes detailed surveying.                                                                                                           |
| Land acquisition                                                        | -             | -                 | 0                |                                                                                                                                        |
| Total                                                                   | -             | -                 | <b>129,955</b>   |                                                                                                                                        |
| Total cost                                                              | -             | -                 | <b>1,949,325</b> | <b>Say \$1.95 million</b>                                                                                                              |

**Table S4.** Cost of potential rainwater tank farm.

| ITEM                                   | UNIT<br>COST (\$) | UNITS | COST<br>(\$) | COMMENT |
|----------------------------------------|-------------------|-------|--------------|---------|
| Total direct costs                     | -                 | -     | -            |         |
| Site preparation and tank construction |                   | -     |              |         |

| ITEM                                                                        | UNIT<br>COST (\$) | UNITS  | COST<br>(\$)   | COMMENT                                                                                                                                                      |
|-----------------------------------------------------------------------------|-------------------|--------|----------------|--------------------------------------------------------------------------------------------------------------------------------------------------------------|
| Access to site                                                              | 5,000             | LS†    | 5,000          | Nominal amount for dirt road construction and ensure landholder access to their property is maintained.                                                      |
| 0.247-ML rainwater tanks                                                    | 39,938            | 9      | 359,442        | Tanks 3.23 m height and 14 m diameter. Cost includes site preparation, concrete ring, construction, installation pumps and plumbing tank into pressure pipe. |
| Security fencing                                                            | 110               | 200    | 22,000         |                                                                                                                                                              |
| Total                                                                       | -                 | -      | <b>386,442</b> |                                                                                                                                                              |
| Water treatment system                                                      | -                 | -      | -              |                                                                                                                                                              |
| 25,000-L tank for storing treated water                                     | 1                 | 12,200 | 12,200         |                                                                                                                                                              |
| Pressure piping from tank farms to water treatment system                   | 100               | 13     | 1,300          | 50-mm pressure pipe plus \$5000 labour for trenching (also containing power cables) and \$1500 extra fittings.                                               |
| Diesel generators                                                           | 5,000             | 2      | 10,000         |                                                                                                                                                              |
| Electrical connections                                                      | 10,000            | LS     | 10,000         |                                                                                                                                                              |
| High volume pumps to supply water from treated tank to water carting trucks | 5,000             | 2      | 10,000         | Includes piping and hosing.                                                                                                                                  |
| Housing for water treatment system                                          | 5,000             | LS     | 10,000         |                                                                                                                                                              |
| In-line cartridge filter                                                    | 700               | LS     | 700            |                                                                                                                                                              |
| Commercial grade UV                                                         | 6,000             | 1      | 6,000          |                                                                                                                                                              |
| Smart water savers                                                          | 700               | 2      | 1,400          |                                                                                                                                                              |
| Total                                                                       | -                 | -      | <b>61,600</b>  |                                                                                                                                                              |
| Total direct cost (TDC)                                                     | -                 | -      | <b>711,633</b> |                                                                                                                                                              |
| Contractor overheads                                                        | -                 | -      | -              |                                                                                                                                                              |
| Mobilisation/demobilisation                                                 | 5%                | -      | 22,402         |                                                                                                                                                              |
| Site overheads                                                              | 5%                | -      | 22,402         |                                                                                                                                                              |
| Contingencies                                                               | 20%               | -      | 89,608         |                                                                                                                                                              |
| Total (TCO)                                                                 | -                 | -      | <b>134,413</b> |                                                                                                                                                              |
| Design costs, approvals and acquisition                                     | -                 | -      | -              |                                                                                                                                                              |
| Design costs and approvals                                                  | 10%               | -      | 44,804         | Includes project management and surveying.                                                                                                                   |
| Land acquisition (ha)                                                       |                   | 0      | 60,500         | Nominal value. Will vary between locations. Area includes enclosure and allowance for access road.                                                           |
| Total (TDCAA)                                                               | -                 | -      | <b>105,304</b> |                                                                                                                                                              |
| Total cost (TC = TDC + TCO + TDCAA)                                         | -                 | -      | <b>687,759</b> |                                                                                                                                                              |

**Table S5.** Indicative cost of twelve new deep groundwater bores.

| ITEM                                         | UNIT COST (\$) | UNITS | COST (\$)        | COMMENT                                                                                                                  |
|----------------------------------------------|----------------|-------|------------------|--------------------------------------------------------------------------------------------------------------------------|
| Exploratory holes                            | 500            | 2100  | 1,050,000        | 14 holes at an average of 75 m                                                                                           |
| Production bores                             | 1000           | 900   | 900,000          | 6 holes at an average of 75 m                                                                                            |
| Water storage tanks                          | 39,938         | 12    | 479,256          | 1 x 290 kL tank per bore location                                                                                        |
| Access road                                  | 6,000          | 12    | 72,000           | An associated infrastructure (e.g. turning circle, standpipes etc)                                                       |
| Commercial grade UV treatment and housing    | 6,000          | 12    | 72,000           |                                                                                                                          |
| Total direct costs (TDC)                     |                |       | <b>2,573,256</b> |                                                                                                                          |
| Contractor overheads                         |                |       |                  |                                                                                                                          |
| Mobilisation of operators                    | 3000           | 2     | 6,000            |                                                                                                                          |
| Mobilisation of equipment and operation      | LS             |       | 350,000          | Assumes 160,000 C-17 cost each way and mobilisation costs on mainland Australia and Norfolk Island.                      |
| Operator rates                               | 4000           | 120   | 480,000          | 2 operators for 60 days                                                                                                  |
| Incidentals                                  | 500            | 120   | 60,000           |                                                                                                                          |
| Total                                        |                |       | <b>896,000</b>   |                                                                                                                          |
| Design costs, approvals                      |                |       |                  |                                                                                                                          |
| Design costs, approvals, legal and logistics | 10% TDC        |       | 257,326          |                                                                                                                          |
| Land acquisition (ha)                        |                |       | 60,500           | Nominal value will vary between locations. May be zero if bores can be sited on land owned by the NIRC (e.g. road verge) |
| Contingency                                  | 30% TCC        |       | 771,977          |                                                                                                                          |
| Total                                        |                |       | <b>1,089,802</b> |                                                                                                                          |
| Total cost (TC)                              |                |       | <b>4,559,058</b> | <b>Say 4.56 million with estimated uncertainty of -25% to +75%.</b>                                                      |

**Table S6.** Costs associated with removal of woody weeds. Costs are indicative and will vary between locations depending upon a range of factors such as access and topography. Note cost of hand clearing dense infestations of wood weeds is prohibitive.

| SERVICE                                                                                                   | COST (\$/ha)   | COMMENT                                             |
|-----------------------------------------------------------------------------------------------------------|----------------|-----------------------------------------------------|
| Mechanical clearing of small to medium height woody vegetation, remove roots and burn on-site             | 6000 to 10,000 | Desiree Boudan (BC Excavations), 2020, pers. comm.  |
| Mechanical clearing small to medium height woody vegetation, remove roots and burn on-site and rotary hoe | 10,000         | Jim Tavener (Norfolk Industries), 2020, pers. comm. |

| SERVICE                                                      | COST<br>(\$/ha) | COMMENT                                                                                                                                                            |
|--------------------------------------------------------------|-----------------|--------------------------------------------------------------------------------------------------------------------------------------------------------------------|
| Hand clearing woody weeds from salvageable native vegetation | 7000            | Informed by correspondence with Parks Australia. 1.15 ha took a ranger staff (~\$45/hour) 149 hours. Plus misc. costs (e.g. herbicide) of approximately \$1200/ha. |
| Purchase grass seed and spread                               | 500             | Jim Tavener (Norfolk Industries), 2020, pers. comm.                                                                                                                |
| Follow-up slashing and other maintenance in first year       | 1000 to 1500    | Jim Tavener (Norfolk Industries), 2020, pers. comm.                                                                                                                |
| Annual maintenance in subsequent years                       | 500 to 1000     | Jim Tavener (Norfolk Industries), 2020, pers. comm.                                                                                                                |
